# Supplementary material for: DNA Damage Response in Early Breast Cancer: A Phase III Cohort in the Phobos Study
Source: MDPI journal article supplement (doi:10.3390/cancers16152628), 2024-07-23
Supplement: s1 [file Table S1.pdf › Table S1.pdf]

**Table S1.** DDR biomaker expression in the nucleus (\_N) and in the cytoplasm (\_C), in terms of categorized immunoreactive score.

| <b>Biomarker</b> | <b>Positive,<br/>Strong (%)</b> | <b>Positive,<br/>Intermediate<br/>(%)</b> | <b>Positive,<br/>Weak (%)</b> | <b>Negative<br/>(%)</b> | <b>Unknown<br/>(%)</b> |
|------------------|---------------------------------|-------------------------------------------|-------------------------------|-------------------------|------------------------|
| pATM N           | 16                              | 42                                        | 9                             | 28                      | 5                      |
| pATM C           | 2                               | 9                                         | 9                             | 78                      | 2                      |
| pATR N           | 44                              | 33                                        | 7                             | 14                      | 2                      |
| pATR C           | 4                               | 12                                        | 6                             | 76                      | 2                      |
| pCHK1 N          | 2                               | 10                                        | 8                             | 78                      | 2                      |
| pCHK1 C          | 12                              | 30                                        | 13                            | 42                      | 2                      |
| pH2AX N          | 4                               | 30                                        | 15                            | 49                      | 2                      |
| pH2AX C          | 0                               | 0                                         | 3                             | 95                      | 2                      |
| RPA32 N          | 24                              | 34                                        | 20                            | 20                      | 2                      |
| RPA32 C          | 1                               | 0                                         | 3                             | 94                      | 2                      |
| pWEE N           | 6                               | 35                                        | 17                            | 40                      | 2                      |
| pWEE C           | 5                               | 11                                        | 8                             | 74                      | 2                      |
