# Supplementary material for: DNA Damage Response in Early Breast Cancer: A Phase III Cohort in the Phobos Study
Source: MDPI journal article supplement (doi:10.3390/cancers16152628), 2024-07-23
Supplement: s1 [file Table S2.pdf › Table S2.pdf]

**Table S2.** Complete list of the first degree and second degree terms of the Cox elastic net model.  $\_N$  and in the cytoplasm ( $\_C$ ), in terms of categorized immunoreactive score. DDR biomaker expression in the nucleus ( $\_N$ ) and in the cytoplasm ( $\_C$ ), in terms of categorized immunoreactive score; (\*) indicates interaction terms.

| Coefficient | Biomarker term  |
|-------------|-----------------|
| -0.08       | ATR_C*WEE_N     |
| -0.05       | ATM_C*CHK1_N    |
| -0.05       | ATR_N*ATR_N     |
| -0.04       | ATM_N           |
| -0.04       | ATR_N           |
| -0.04       | ATM_N*ATM_N     |
| -0.04       | ATM_C*ATR_N     |
| -0.04       | ATR_C*ATR_C     |
| -0.04       | H2AX_C*WEE_N    |
| -0.04       | WEE_C*WEE_C     |
| -0.03       | RPA32_C         |
| -0.03       | ATM_C*H2AX_N    |
| -0.03       | CHK1_C*WEE_C    |
| -0.02       | ATR_C           |
| -0.02       | CHK1_N          |
| -0.02       | H2AX_C          |
| -0.02       | ATM_N*ATR_N     |
| -0.02       | ATM_N*CHK1_C    |
| -0.02       | ATM_N*H2AX_C    |
| -0.02       | ATM_N*RPA32_N   |
| -0.02       | ATM_N*RPA32_C   |
| -0.02       | ATM_C*ATM_C     |
| -0.02       | ATR_N*ATR_C     |
| -0.02       | ATR_C*H2AX_N    |
| -0.02       | ATR_C*RPA32_N   |
| -0.02       | ATR_C*RPA32_C   |
| -0.02       | CHK1_C*H2AX_N   |
| -0.02       | CHK1_C*RPA32_C  |
| -0.02       | CHK1_C*WEE_N    |
| -0.02       | H2AX_N*RPA32_N  |
| -0.02       | H2AX_C*H2AX_C   |
| -0.02       | H2AX_C*RPA32_N  |
| -0.02       | RPA32_C*RPA32_C |
| -0.02       | RPA32_C*WEE_N   |

|       |                 |
|-------|-----------------|
| -0.01 | H2AX_N          |
| -0.01 | WEE_C           |
| -0.01 | ATM_N*WEE_N     |
| -0.01 | ATM_C*RPA32_C   |
| -0.01 | ATR_N*CHK1_N    |
| -0.01 | ATR_N*CHK1_C    |
| -0.01 | ATR_N*H2AX_C    |
| -0.01 | CHK1_N*H2AX_N   |
| -0.01 | CHK1_N*RPA32_N  |
| -0.01 | RPA32_N*WEE_C   |
| -0.01 | WEE_N*WEE_N     |
| 0     | CHK1_C          |
| 0     | ATR_N*RPA32_N   |
| 0     | ATR_N*RPA32_C   |
| 0     | ATR_N*WEE_N     |
| 0     | CHK1_N*CHK1_C   |
| 0     | CHK1_N*H2AX_C   |
| 0     | CHK1_N*RPA32_C  |
| 0     | CHK1_C*H2AX_C   |
| 0     | H2AX_N*H2AX_N   |
| 0     | H2AX_C*RPA32_C  |
| 0     | RPA32_N*RPA32_C |
| 0     | WEE_N*WEE_C     |
| 0.01  | RPA32_N         |
| 0.01  | WEE_N           |
| 0.01  | ATM_N*WEE_C     |
| 0.01  | ATR_N*H2AX_N    |
| 0.01  | ATR_C*CHK1_N    |
| 0.01  | CHK1_N*CHK1_N   |
| 0.01  | CHK1_C*CHK1_C   |
| 0.02  | ATM_N*ATM_C     |
| 0.02  | ATM_N*ATR_C     |
| 0.02  | ATM_N*CHK1_N    |
| 0.02  | ATM_C*WEE_N     |
| 0.02  | CHK1_C*RPA32_N  |
| 0.03  | ATM_C           |
| 0.03  | ATM_N*H2AX_N    |
| 0.03  | ATM_C*ATR_C     |
| 0.03  | ATM_C*RPA32_N   |

|      |                 |
|------|-----------------|
| 0.03 | ATM_C*WEE_C     |
| 0.03 | RPA32_N*RPA32_N |
| 0.04 | ATR_N*WEE_C     |
| 0.04 | ATR_C*CHK1_C    |
| 0.04 | ATR_C*H2AX_C    |
| 0.04 | ATR_C*WEE_C     |
| 0.04 | CHK1_N*WEE_N    |
| 0.04 | H2AX_N*H2AX_C   |
| 0.04 | H2AX_N*WEE_N    |
| 0.04 | H2AX_N*WEE_C    |
| 0.05 | H2AX_C*WEE_C    |
| 0.05 | RPA32_C*WEE_C   |
| 0.06 | ATM_C*CHK1_C    |
| 0.07 | RPA32_N*WEE_N   |
| 0.08 | ATM_C*H2AX_C    |
| 0.09 | H2AX_N*RPA32_C  |
| 0.11 | CHK1_N*WEE_C    |
